# Supplementary material for: A high voltage aqueous proton battery using an optimized operation of a MoO3 positive electrode
Source: Royal Society of Chemistry journal article supplement (doi:10.1039/d2ta08581j), 2023-01-01
Supplement: d2ta08581j1.pdf [file d2ta08581j1.pdf]

**Supporting Information of**

**“A High Voltage Aqueous Proton Battery using an Optimized**

**Operation of a MoO<sub>3</sub> Positive Electrode”**

Atsunori Ikezawa<sup>1,\*</sup>, Yukinori Koyama<sup>2</sup>, Tadaaki Nishizawa<sup>1</sup>, Hajime Arai<sup>1</sup>

*1. School of Materials and Chemical Technology, Tokyo Institute of Technology, Yokohama 226-8502, Japan*

*2. Research and Services Division of Materials Data and Integrated System, National Institute for Materials Science, Tsukuba 305-0044, Japan*

\* Corresponding Author: (E-mail) [ikezawa.a.aa@m.titech.ac.jp](mailto:ikezawa.a.aa@m.titech.ac.jp)

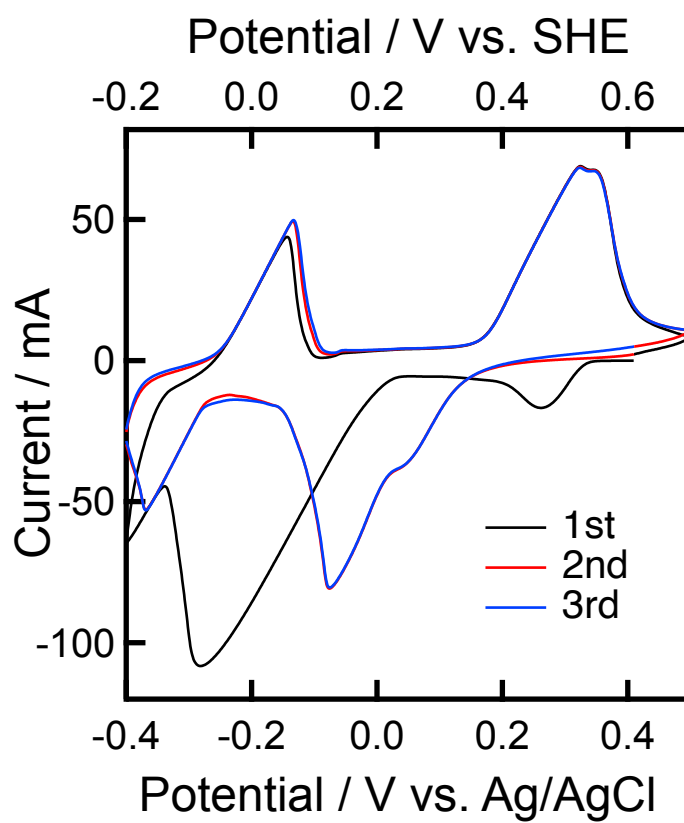

Figure S1. A cyclic voltammogram of the MoO<sub>3</sub> composite electrode at 10 mV sec<sup>-1</sup> in 50 wt% H<sub>2</sub>SO<sub>4</sub> aq.

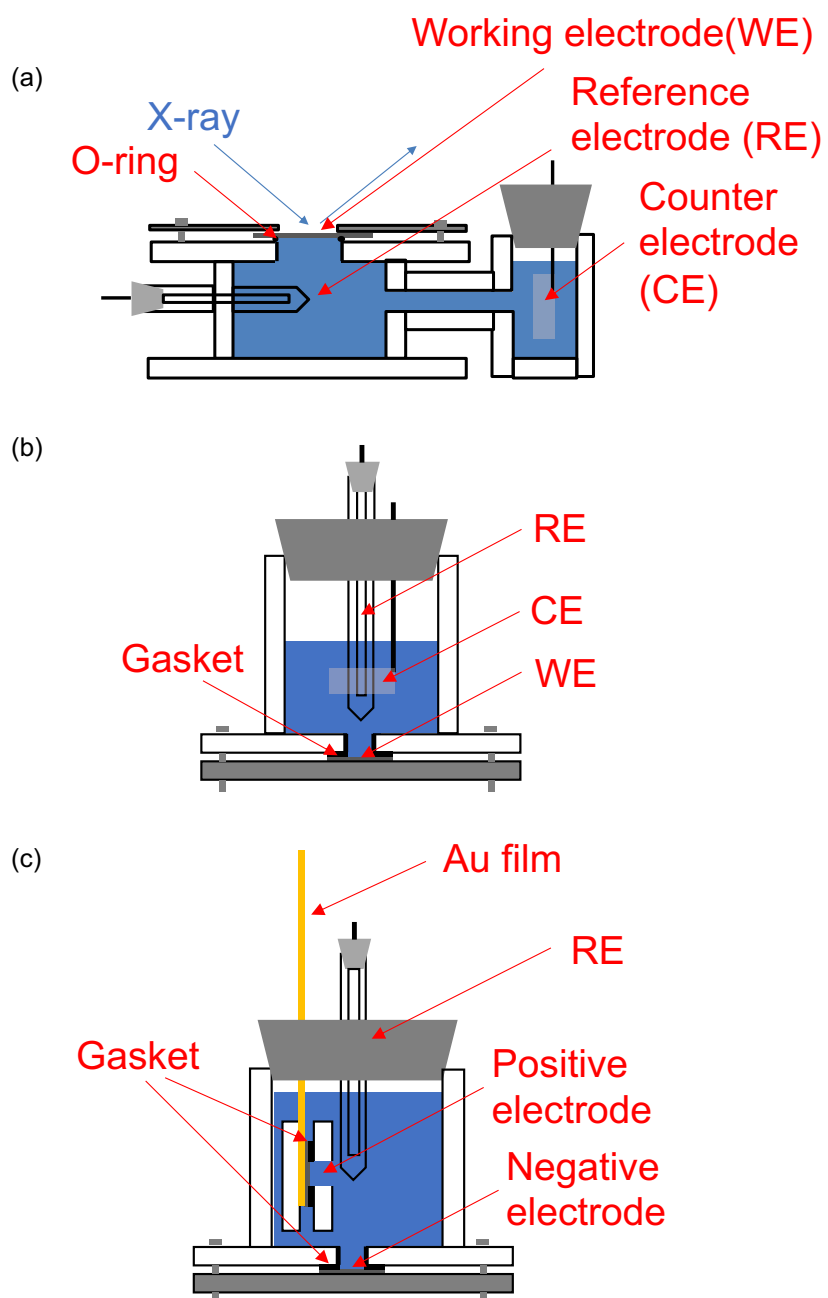

Figure S2. Schematics of electrochemical three-electrode half-cells for (a) operando X-ray diffraction and (b) charge-discharge measurements and (c) electrochemical three-electrode full-cells.

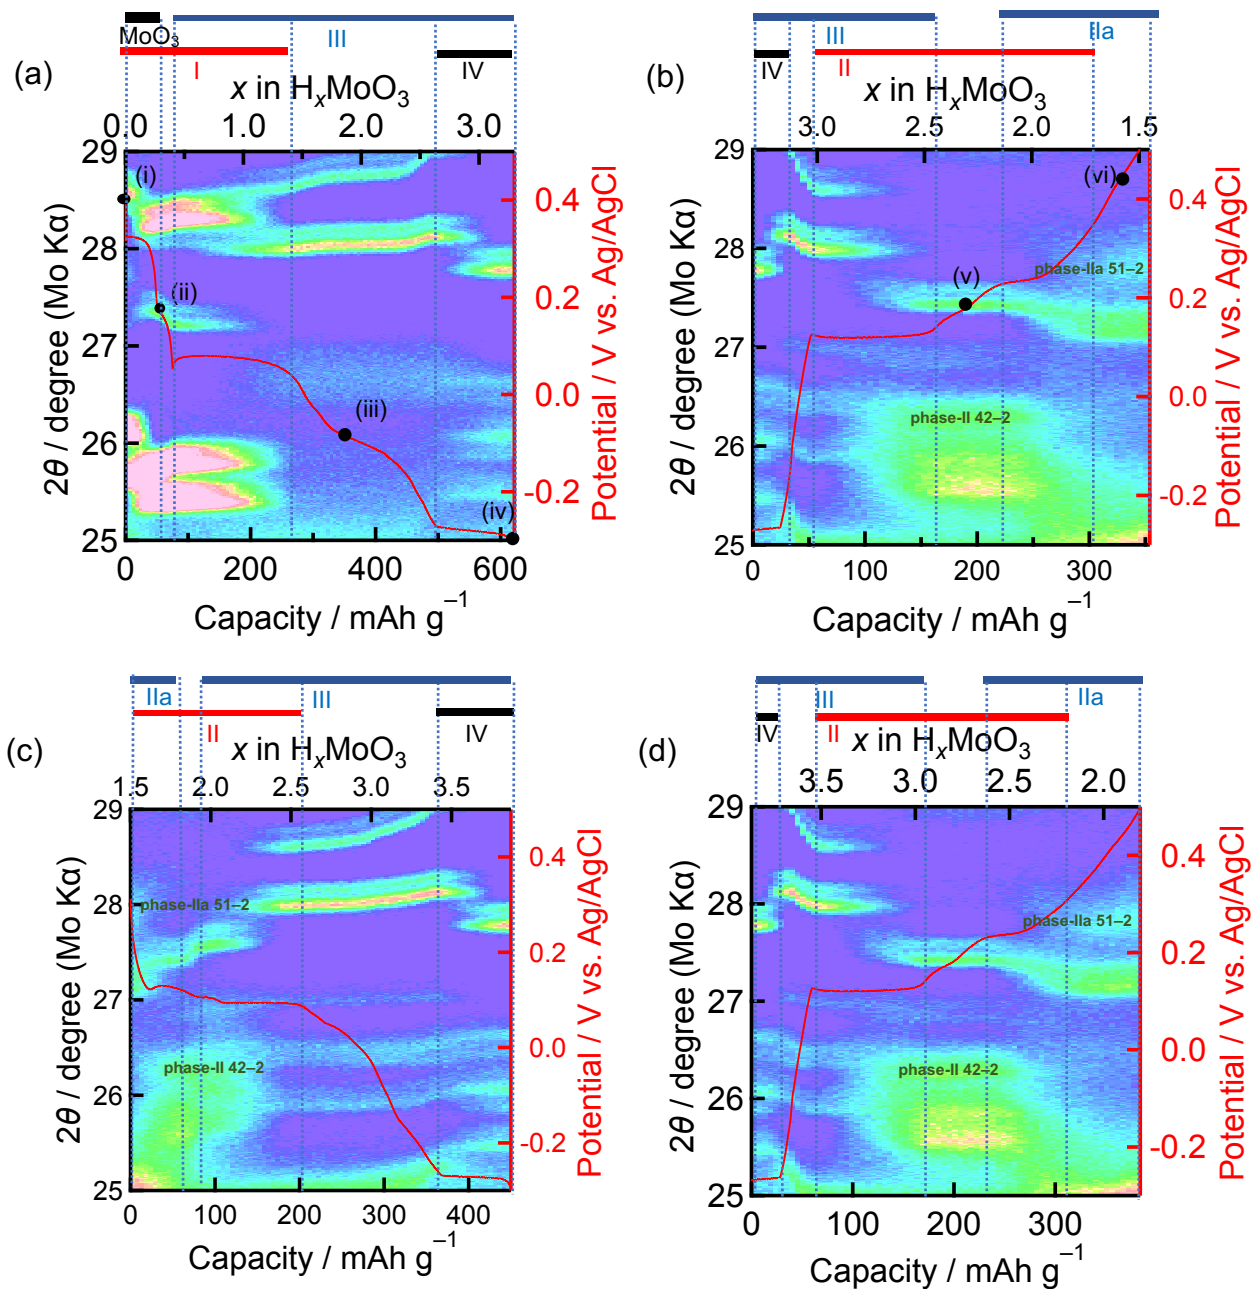

Figure S3. Operando XRD patterns of the  $\text{MoO}_3$  electrode during reduction-oxidation in the potential range from  $-0.30$  to  $0.50$  V at  $100 \text{ mA g}^{-1}$ ; contour plots of (a) 1st reduction, (b) 1st oxidation, (c) 2nd reduction, and (d) 2nd oxidation.

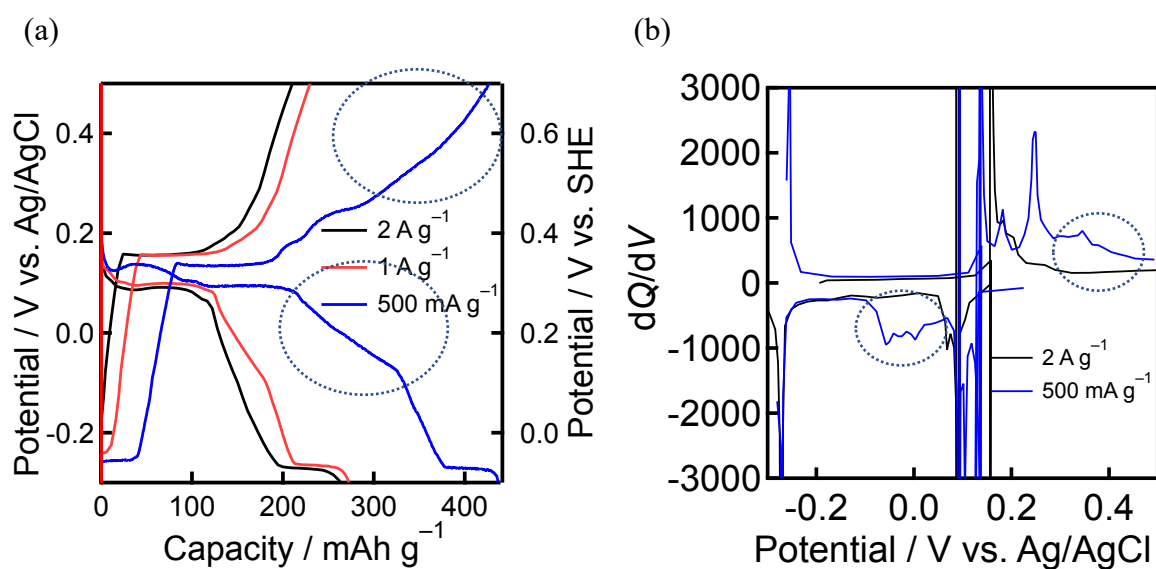

Figure S4. Charge-discharge property of the  $\text{MoO}_3$  electrode in the potential range from  $-0.30$  to  $0.50$  V; (a) charge-discharge curves; (b)  $dQ/dV$  plots. Dotted circles show the redox couple at around  $0.3$  and  $-0.1$  V, which is only observed at low-rate reduction-oxidations ( $< 500 \text{ mA g}^{-1}$ ) as describe in the manuscript.

a) From a-axis

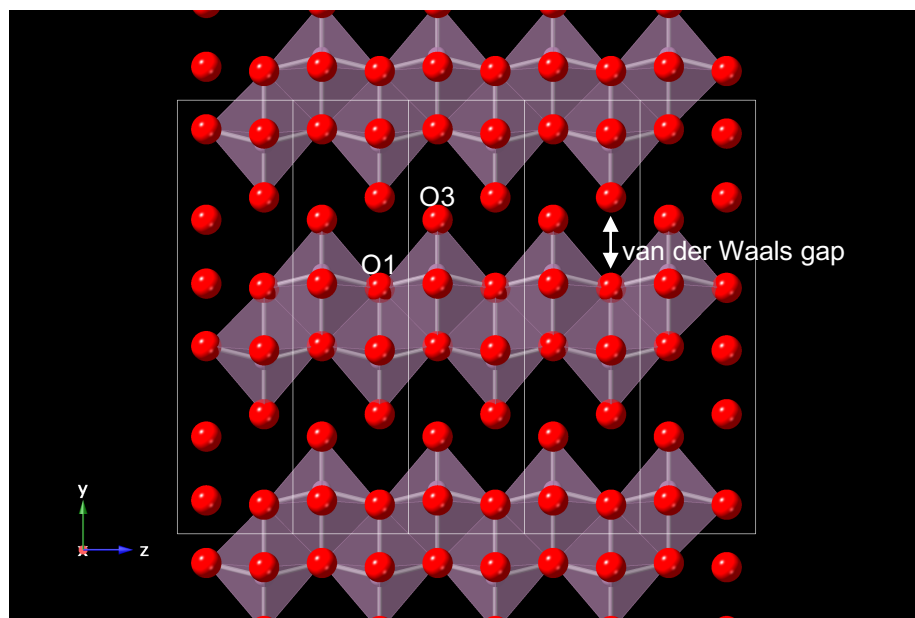

b) From c-axis

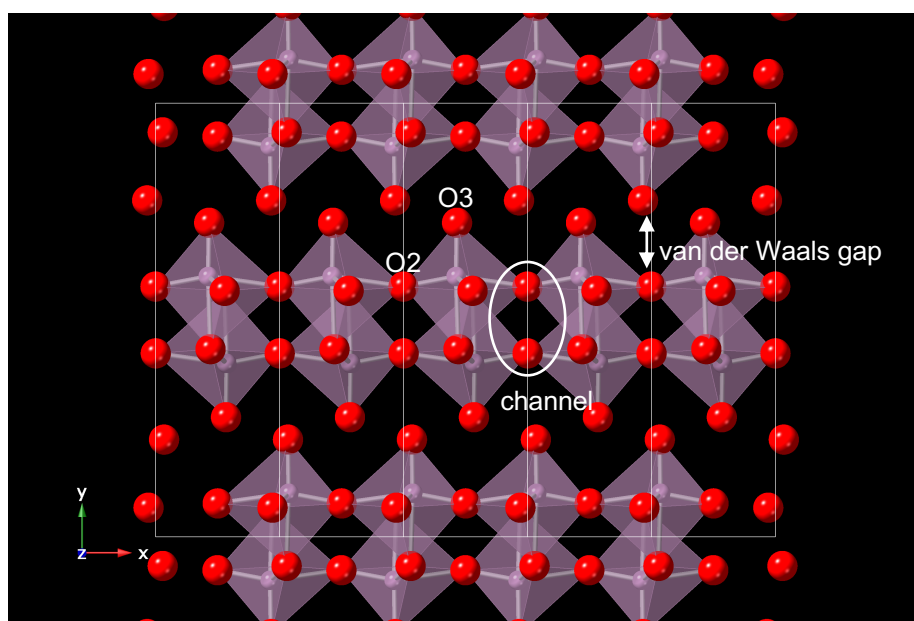

Figure S5. Schematic views of crystal structure of MoO<sub>3</sub>. Purple polyhedral and red spheres denote MoO<sub>6</sub> octahedra and O atoms, respectively.

Table S1. Structure parameters of MoO<sub>3</sub>.

| Calculated   |        |           |     | Experimental [1] |         |     |
|--------------|--------|-----------|-----|------------------|---------|-----|
| <i>a</i> / Å |        | 3.9105    |     |                  | 3.9609  |     |
| (Error)      |        | (-1.27%)  |     |                  |         |     |
| <i>b</i> / Å |        | 15.5116   |     |                  | 13.8570 |     |
| (Error)      |        | (+11.94%) |     |                  |         |     |
| <i>c</i> / Å |        | 3.7304    |     |                  | 3.6953  |     |
| (Error)      |        | (+0.95%)  |     |                  |         |     |
| Mo (4c)      | 0.0678 | 0.0957    | 1/4 | 0.075            | 0.1003  | 1/4 |
| O1 (4c)      | 0.5016 | 0.4385    | 1/4 | 0.443            | 0.4328  | 1/4 |
| O2 (4c)      | 0.5150 | 0.0820    | 1/4 | 0.501            | 0.0770  | 1/4 |
| O3 (4c)      | 0.0308 | 0.2025    | 1/4 | 0.068            | 0.2242  | 1/4 |

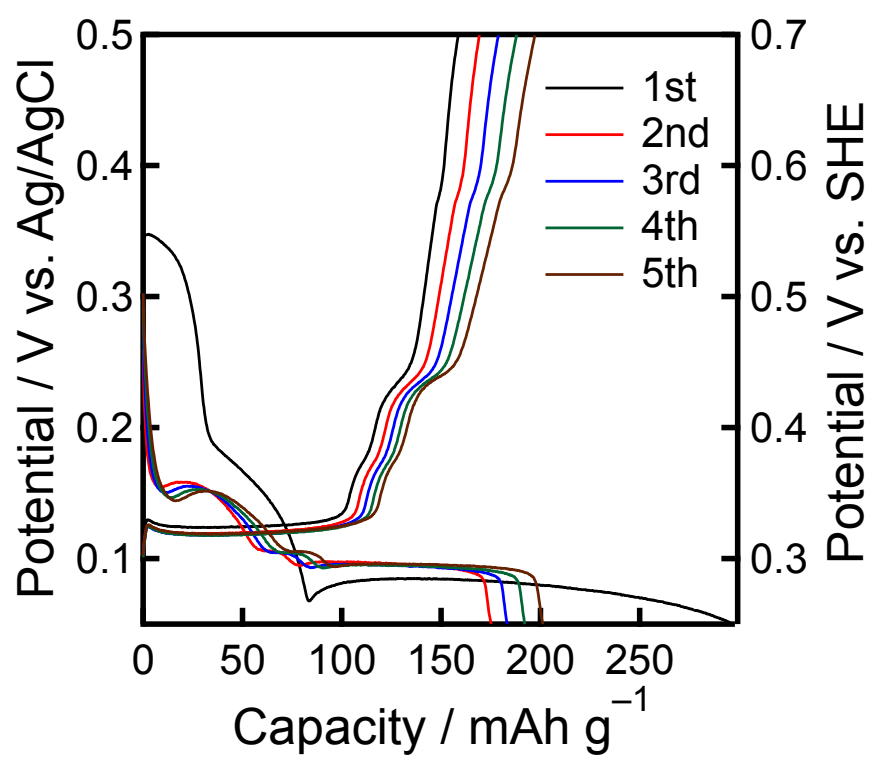

Figure S6. Charge-discharge curves of the  $\text{MoO}_3$  electrode in the potential range from 0.05 to 0.50 V at  $100 \text{ mA g}^{-1}$ .

As prepared

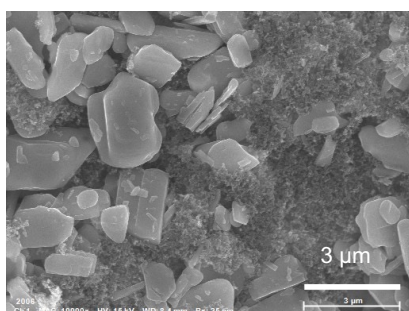

After 1st reduction

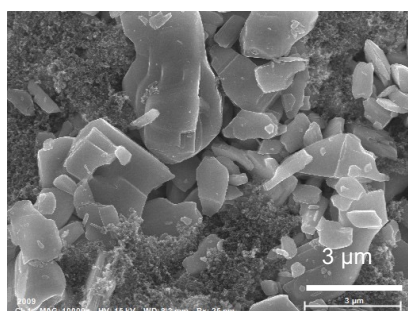

After 30th oxidation

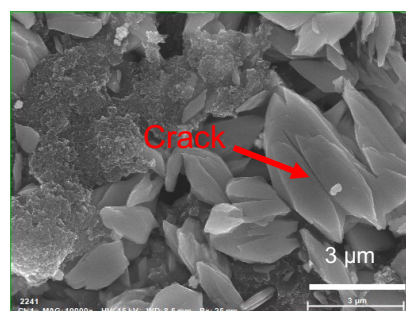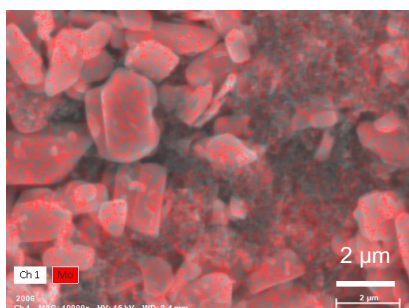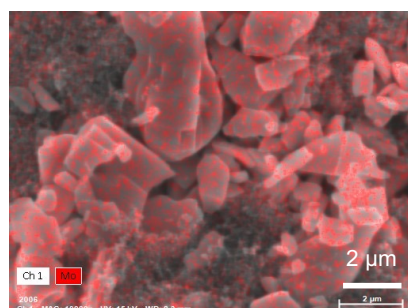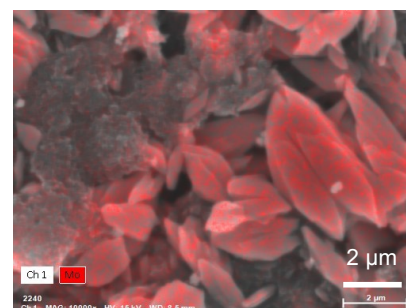

Figure S7. Ex-situ SEM images of the MoO<sub>3</sub> electrodes (upper). EDX maps of Mo element (red) (lower).

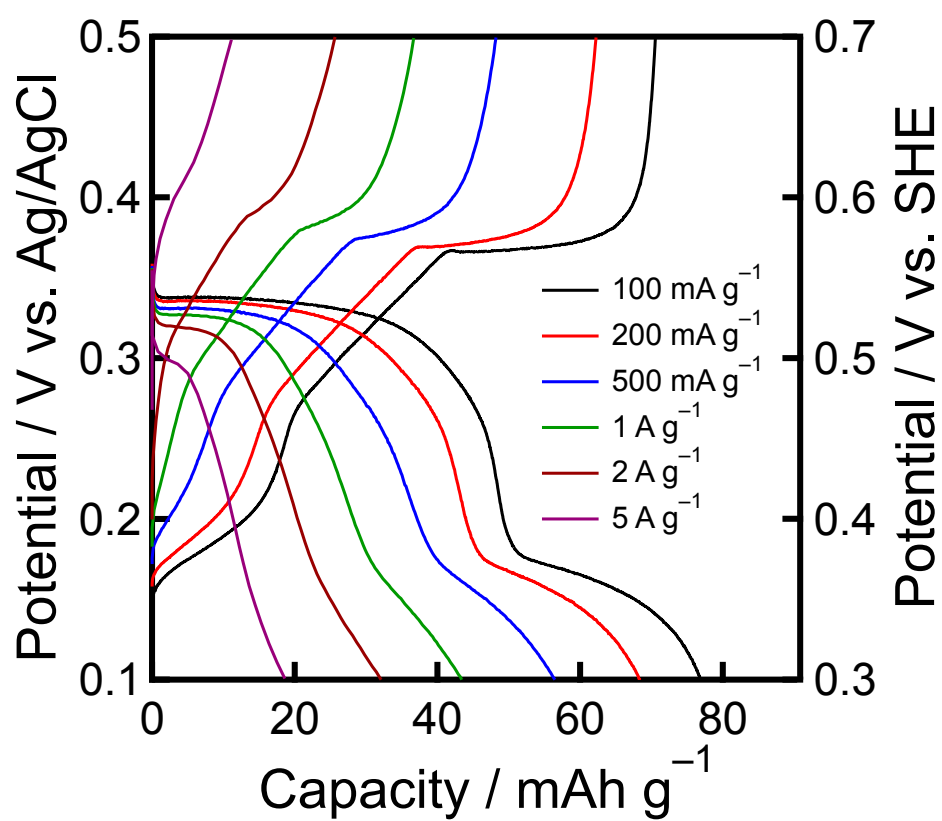

Figure S8. Reduction-oxidation curves of the  $\text{MoO}_3$  electrode at different current densities.

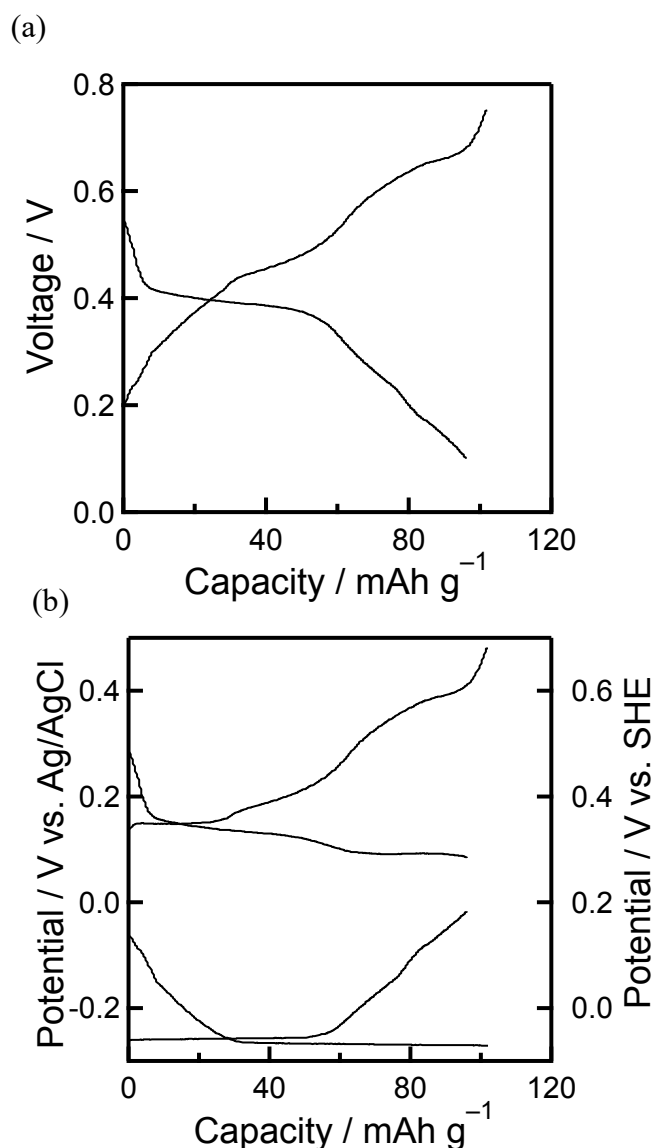

Figure S9. Charge-discharge property of the  $\text{H}_x\text{MoO}_3$  (phase-IIa|phase-III)|50 wt%  $\text{H}_2\text{SO}_4$ | $\text{H}_x\text{MoO}_3$  (phase-III|Phase-IV) full-cell at 200 mA g<sup>-1</sup>, 1st cycle; (a) cell voltage; (b) potentials of positive and negative electrodes. The capacities were calculated based on the mass of  $\text{MoO}_3$  in one side of the electrode. The loading masses of the positive and negative electrodes were set to the same value. Before the full-cell construction, the positive and negative electrodes were electrochemically preconditioned with the half cells. The positive electrode was reduced and oxidized in the potential range from 0 to 0.5 V at 200 mA g<sup>-1</sup> for 3 cycles, and the cycle was terminated at the reduced state. The negative electrode was reduced and oxidized in the potential range from -0.3 to 0.0 V at 100 mA g<sup>-1</sup> for 3 cycles, and the cycle was terminated at the oxidized state. The average discharge voltage and energy density based on the total mass of the active materials are 0.33 V and 15 Wh kg<sup>-1</sup>, respectively.

Table S2. Performances of the full cells shown in Fig. 5 and Fig. S9. The capacities during the first discharging and energy densities were calculated based on the total masses of the active materials.

| Cell configuration                                                                  | Capacity / mAh g <sup>-1</sup> | Average voltage / V | Energy density / Wh kg <sup>-1</sup> |
|-------------------------------------------------------------------------------------|--------------------------------|---------------------|--------------------------------------|
| MoO <sub>3</sub>  phase-I 50 wt% H <sub>2</sub> SO <sub>4</sub>  phase-III Phase-IV | 36.5                           | 0.48                | 17                                   |
| phase-IIa phase-III 50 wt% H <sub>2</sub> SO <sub>4</sub>  phase-III Phase-IV       | 46.5                           | 0.33                | 15                                   |

## Reference

1. T. Leisegang, A.A. Levin, J.M. Walter, D.C. Meyer, Cryst. Res. Technol., 2005, **40**, 95-105.
